# Supplementary material
Source: Springer Nature journal article supplement (https://www.springermedizin.de/resource/supplementary/12916_2010_382_MOESM1_ESM.pdf/9599830)
Supplement: MOESM1 [file 9599830]

|                                    |                         |    |
|------------------------------------|-------------------------|----|
| Conducting zone                    | Trachea                 | Z  |
|                                    |                         | 0  |
|                                    | Bronchi                 | 1  |
|                                    |                         | 2  |
|                                    | Bronchioles             | 3  |
|                                    |                         | 4  |
| Terminal bronchioles               | 5                       |    |
| Transitional and respiratory zones |                         | ↓  |
|                                    |                         | 16 |
|                                    | Respiratory bronchioles | 17 |
|                                    |                         | 18 |
|                                    |                         | 19 |
|                                    | Alveolar ducts          | 20 |
|                                    |                         | 21 |
|                                    |                         | 22 |
| Alveolar sacs                      | 23                      |    |
